# Supplementary material
Source: PubMed Central journal article supplement (PMC6054821)
Supplement: NIHMS967414-supplement.pdf [file NIHMS967414-supplement.pdf]

# Recyclable Magnetic Nanoparticles Grafted with Antimicrobial Metallopolymer-Antibiotic Bioconjugates

Parasmani Pageni<sup>†</sup>, Peng Yang<sup>†</sup>, Marpe Bam<sup>‡</sup>, Tianyu Zhu<sup>†</sup>, Yung Pin Chen<sup>§</sup>, Alan W. Decho<sup>§</sup>, Mitzi Nagarkatti<sup>‡</sup>, and Chuanbing Tang<sup>†\*</sup>

<sup>†</sup>Department of Chemistry and Biochemistry, University of South Carolina, Columbia, South Carolina 29208, United States

<sup>§</sup>Department of Environmental Health Sciences, University of South Carolina, Columbia, South Carolina 29208, United States

<sup>‡</sup>Department of Pathology, Microbiology and Immunology, University of South Carolina School of Medicine, Columbia, South Carolina 29209, United States

## Supplementary Information

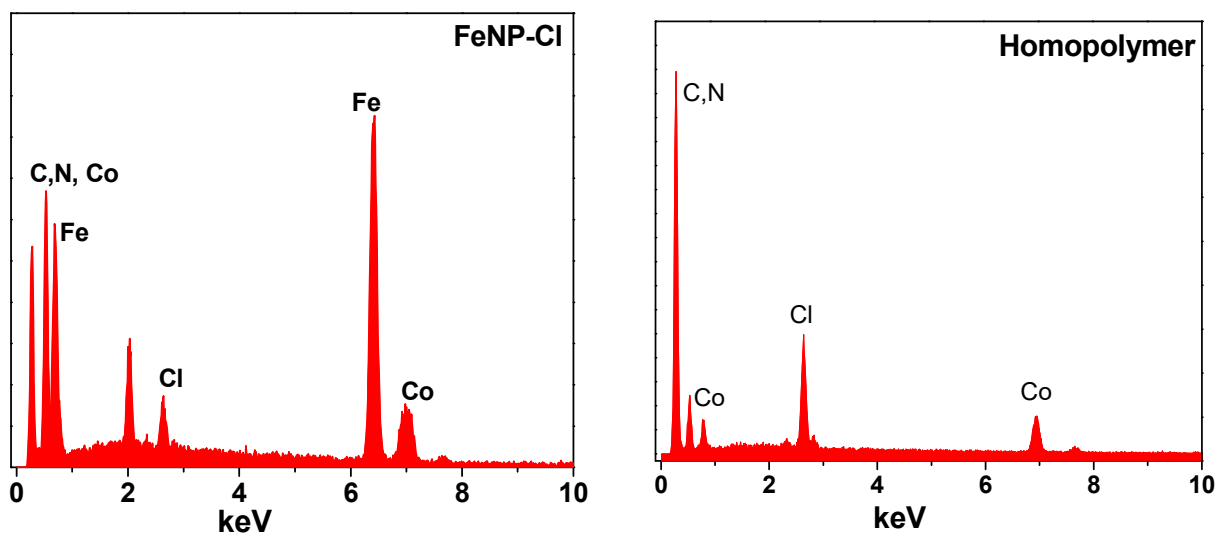

**Figure S1.** EDX elemental analysis of cobaltocenium-containing iron oxide nanoparticles and cobaltocenium-containing homopolymer.

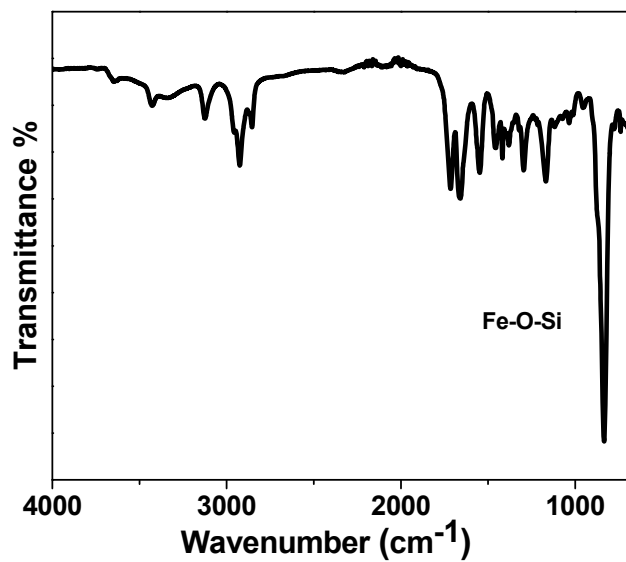

**Figure S2.** FT-IR spectrum of FeNP nanoparticles.

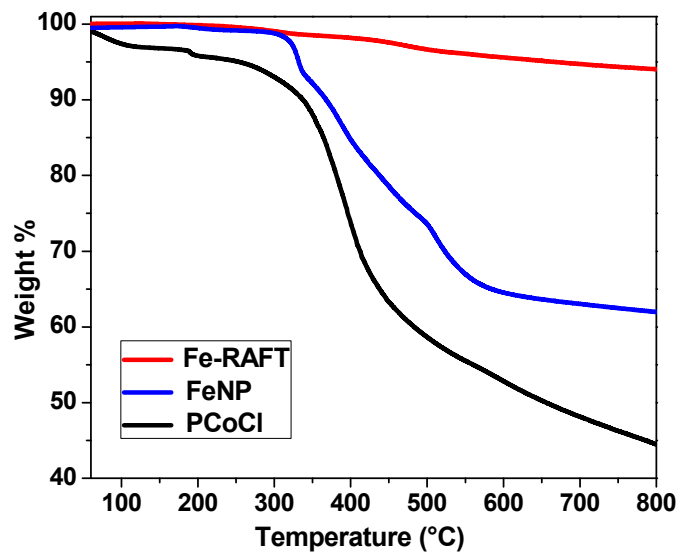

**Figure S3.** Thermogravimetric analysis curves of cobaltocenium-containing iron nanoparticles.

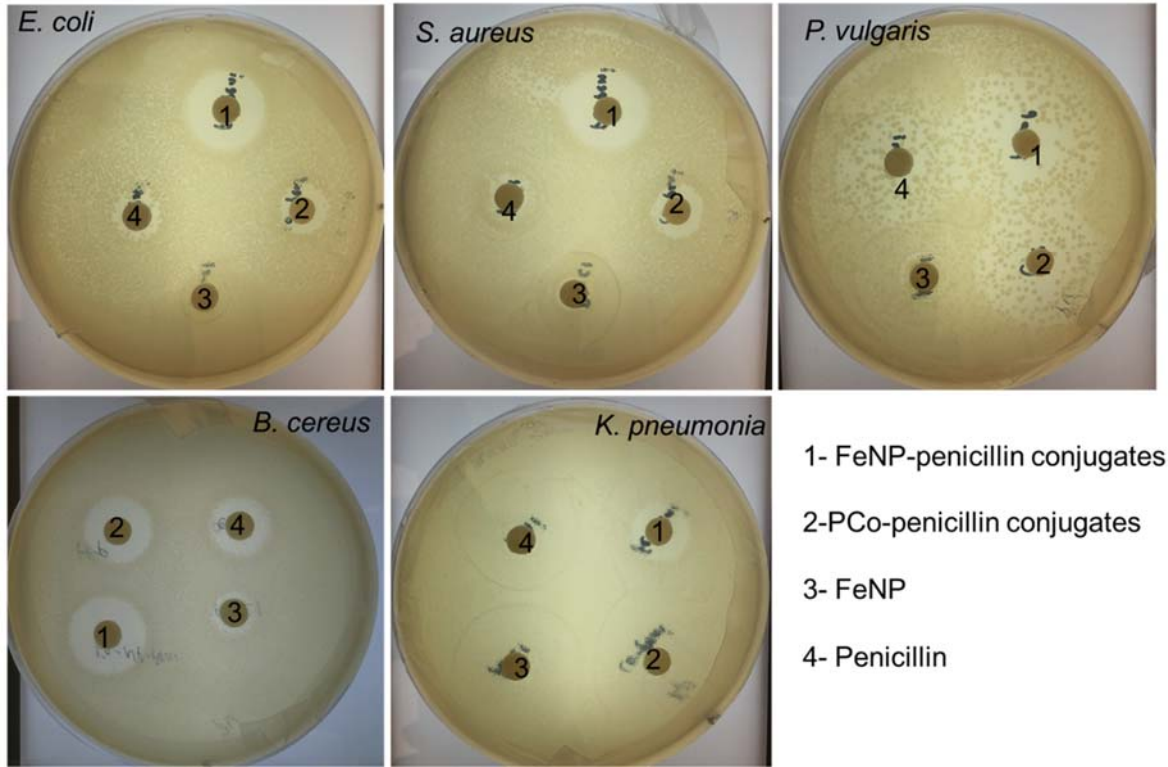

**Figure S4.** Antimicrobial effect of cobaltocenium-containing iron oxide nanoparticles against different strains of bacteria at 7 µg penicillin using disk-diffusion assays.

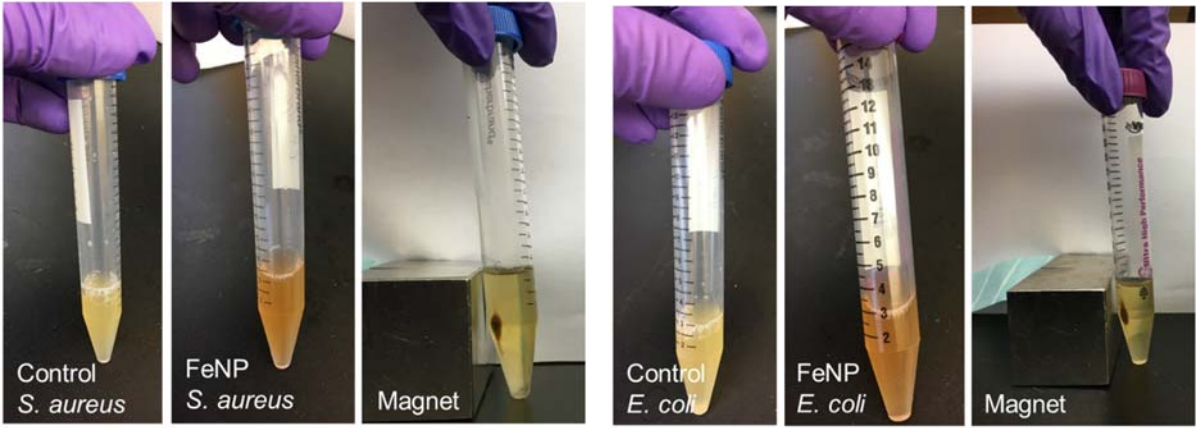

**Figure S5.** Images of cobaltocenium-containing iron oxide nanoparticles incubating and recycling against various bacteria

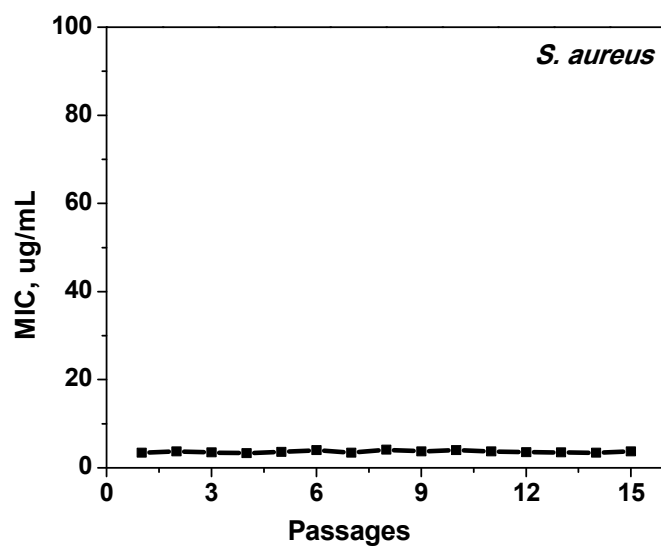

**Figure S6.** Drug-resistance study of FeNP-penicillin conjugates against *S. aureus*.

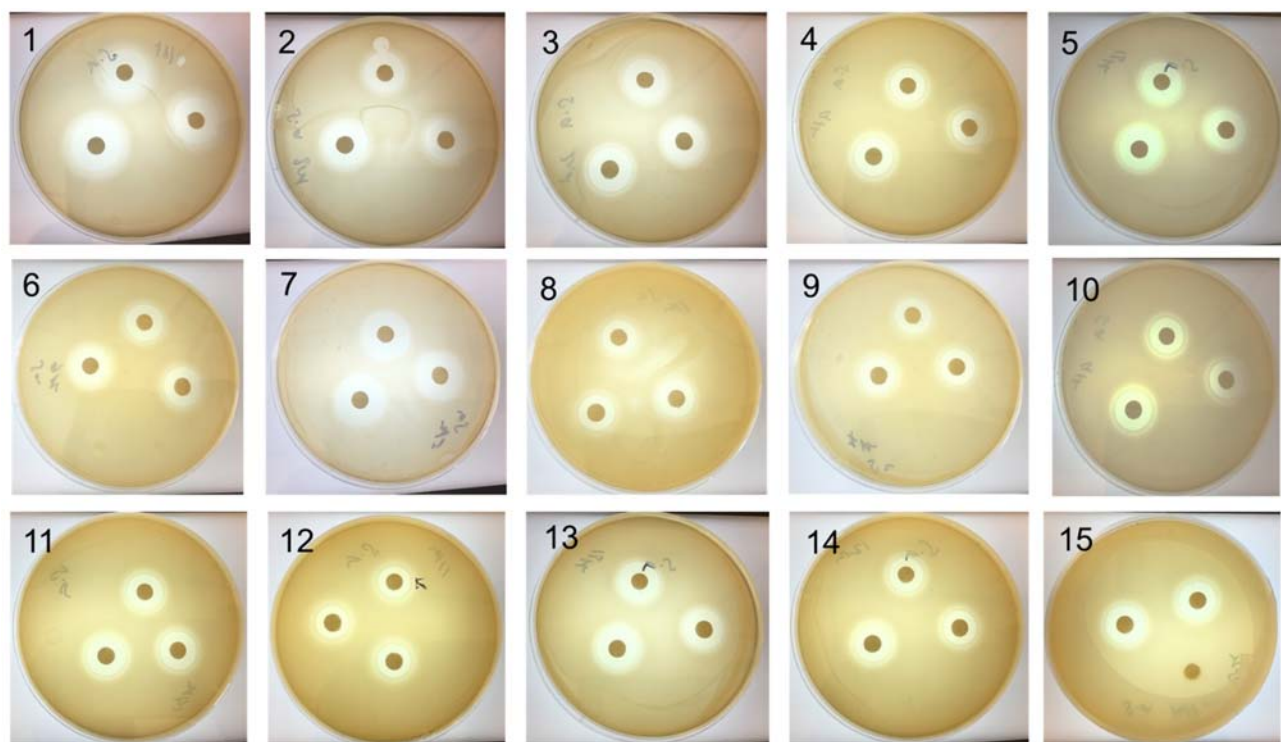

**Figure S7.** Disk diffusion assay to study drug-resistance study of FeNP-penicillin conjugates against *S. aureus* for 15 passages.

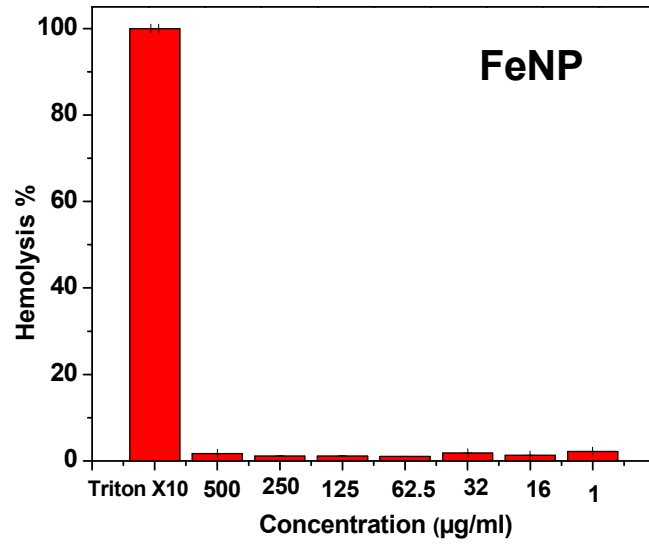

**Figure S8.** Hemolysis test results for FeNP nanoparticles.
